# Supplementary material for: Deep Learning-Based Computational Cytopathologic Diagnosis of Metastatic Breast Carcinoma in Pleural Fluid
Source: MDPI journal article supplement (doi:10.3390/cells12141847), 2023-07-13
Supplement: s1 [file s1]

Supplementary Figures:

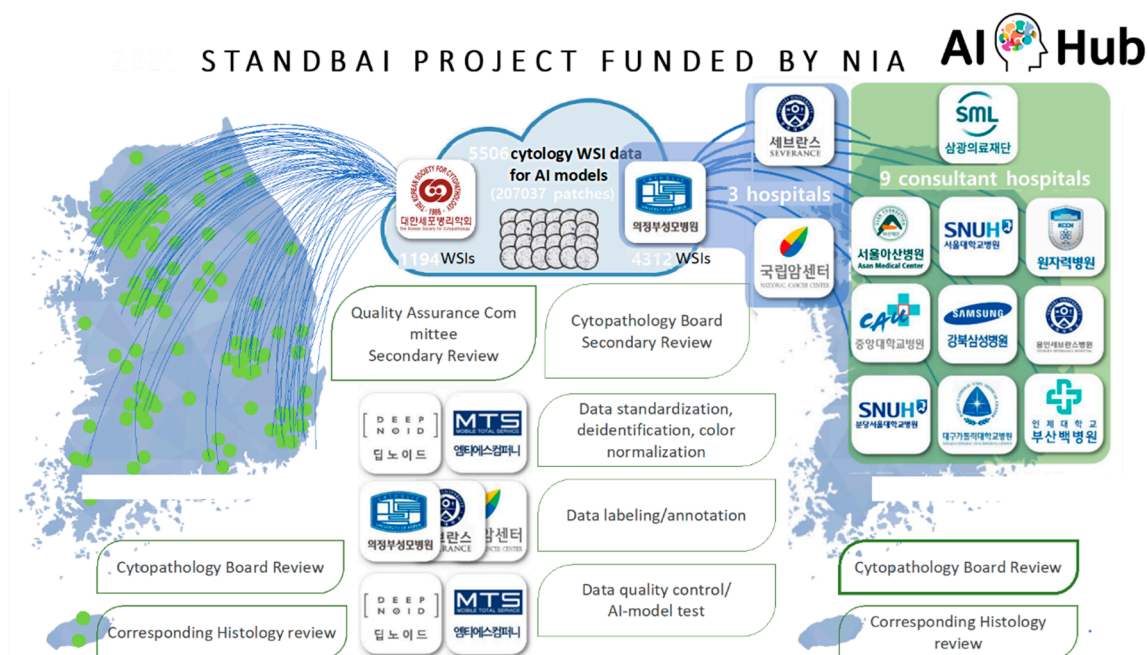

Figure S1. 2021 NIA project for cytopathology dataset.

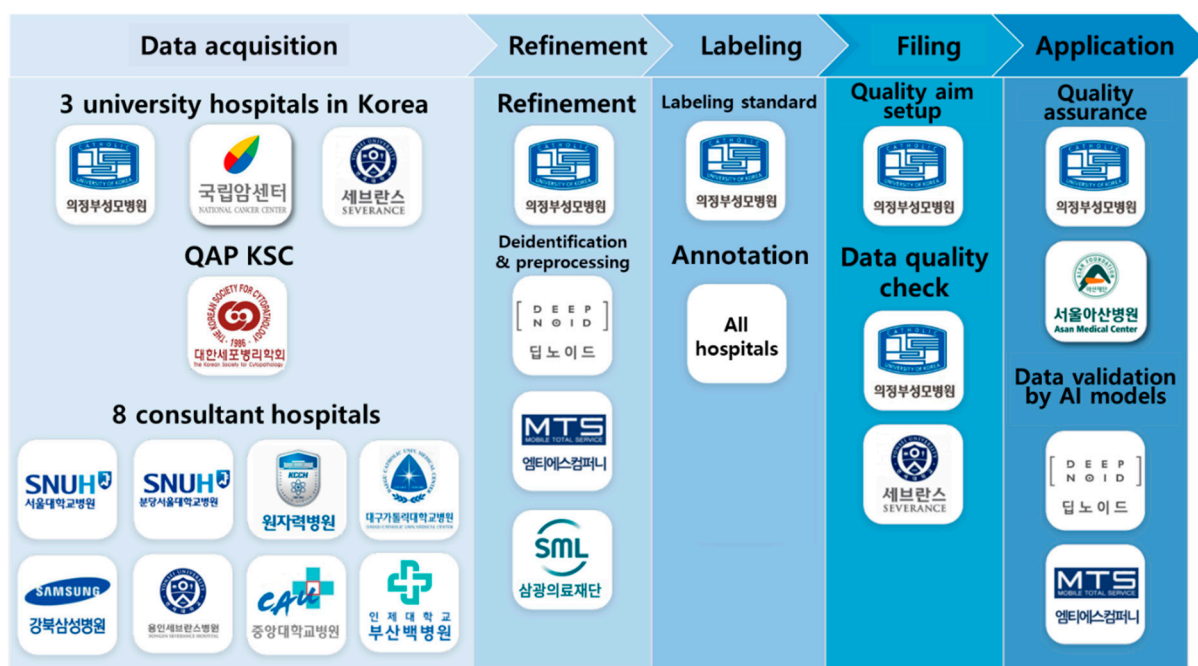

Figure S2. Dataset preparation process.
